# Supplementary material for: Trends in Alcohol-Induced Deaths in the United States, 2000-2016
Source: PubMed Central journal article supplement (PMC7043198; doi:10.1001/jamanetworkopen.2019.21451), 2020-02-21

## Supplementary Online Content

Spillane S, Shiels MS, Best AF, et al. Trends in alcohol-induced deaths in the United States, 2000-2016. *JAMA Netw Open*. 2020;3(2):e1921451. doi:10.1001/jamanetworkopen.2019.21451

**eFigure 1.** Age-Standardized Rates of Alcohol-Induced Deaths, 2000-2016, by Sex and Specific Cause

**eFigure 2.** Male and Female Age-Specific Rates of Alcohol-Induced Deaths for 2013-2016 vs 2009-2012 for Latino/Latina and non-Latino Black Individuals

**eFigure 3.** Male and Female Birth Cohort Effects Derived From Age-Period-Cohort Models for Persons Aged 20-80 Years, Inclusive

**eFigure 4.** Male and Female Time Period Effects Derived From Age-Period-Cohort Models for Persons Aged 20-80 Years, Inclusive

**eFigure 5.** Annual Percentage Change in Alcohol-Induced Mortality Rate, 2000-2016, by County-Level Socioeconomic Status (SES) and Rurality

This supplementary material has been provided by the authors to give readers additional information about their work.

**eFigure 1.** Age-Standardized Rates of Alcohol-Induced Deaths, 2000-2016, by Sex and Specific Cause

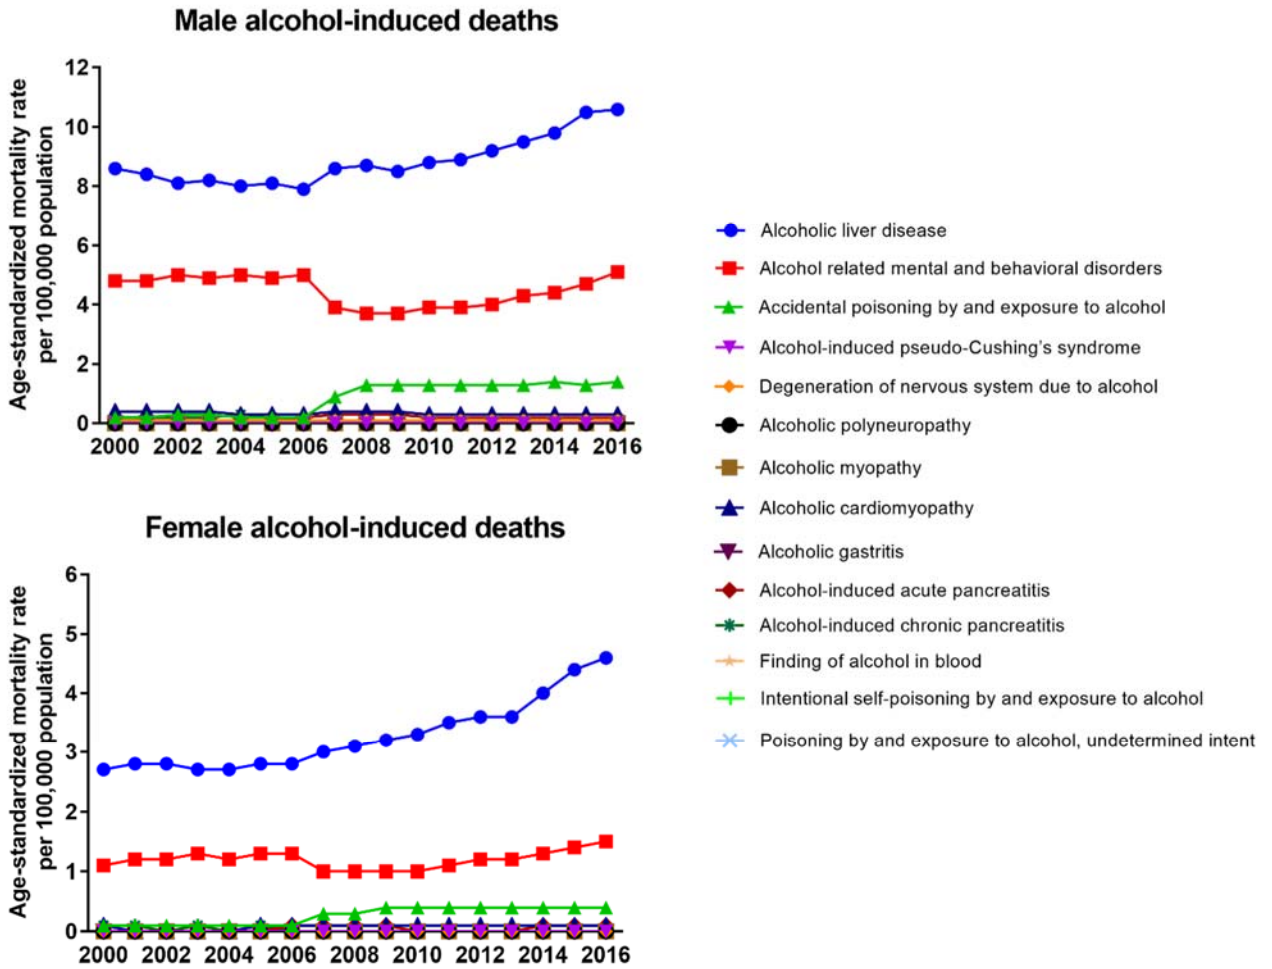

**eFigure 2.** Male and Female Age-Specific Rates of Alcohol-Induced Deaths for 2013-2016 vs 2009-2012 for Latino/Latina and non-Latino Black Individuals

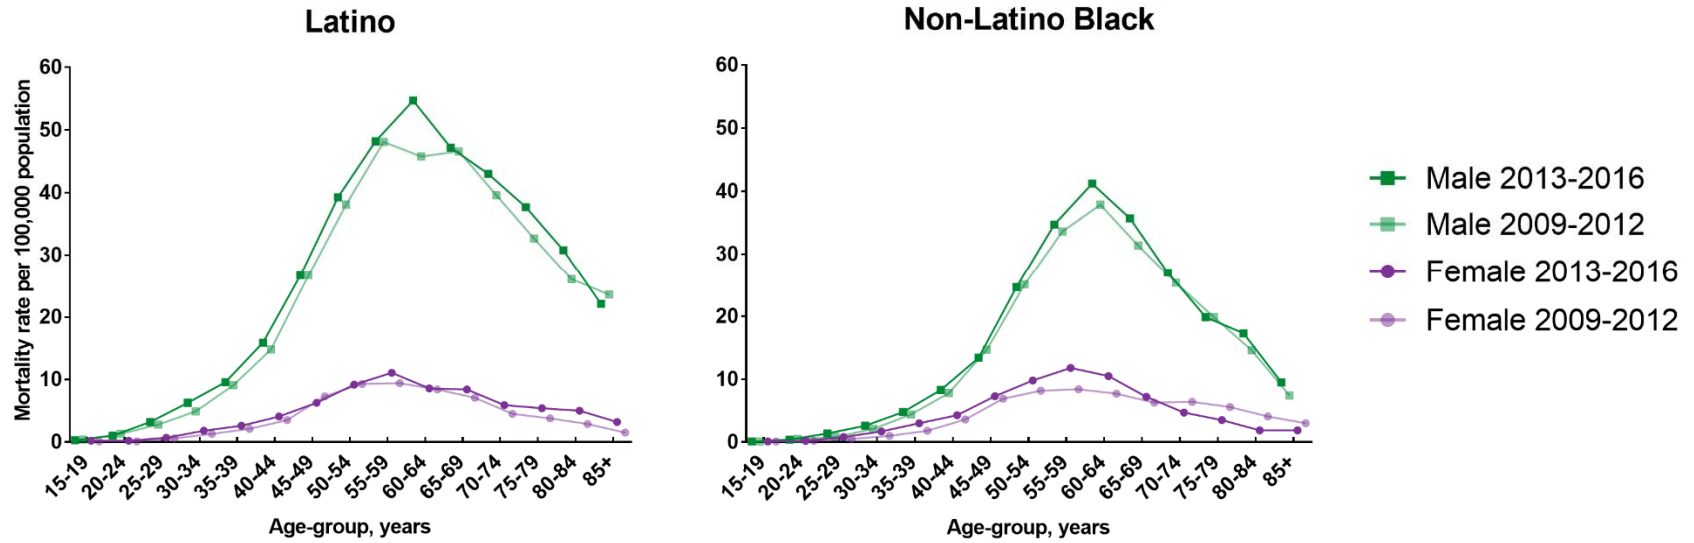

**eFigure 3.** Male and Female Birth Cohort Effects Derived From Age-Period-Cohort Models for Persons Aged 20-80 Years, Inclusive

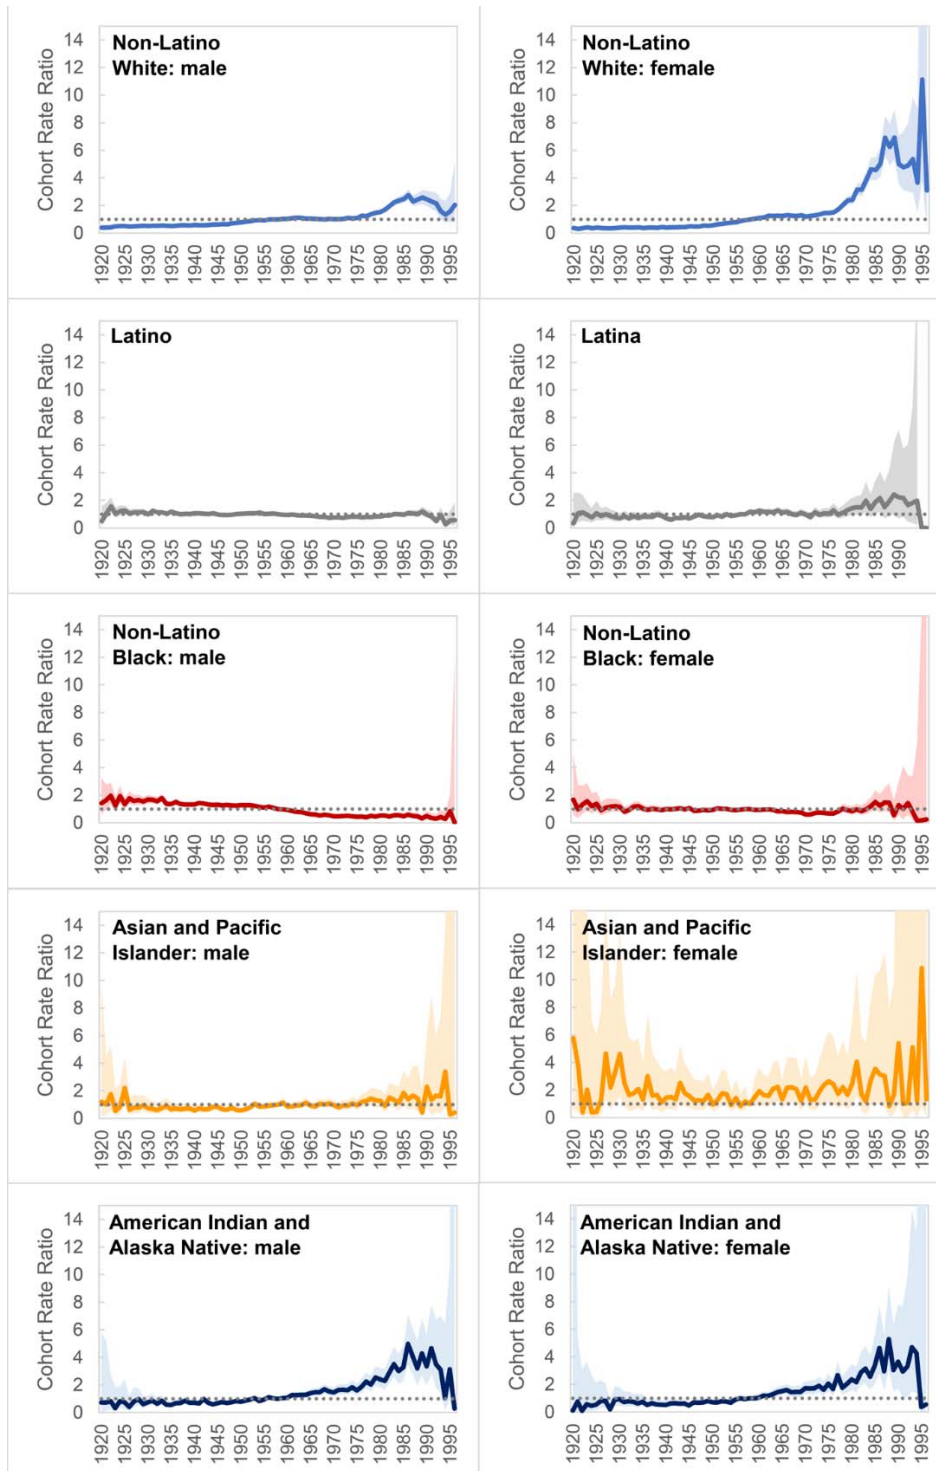

Alcohol-induced mortality rate ratios (with shaded 95% confidence intervals) for each birth cohort, 1920-1996, are expressed relative to the middle birth cohort (1958) (rate ratio =1, depicted with dotted line). Due to sparsity of data 1994-1996, Latina rate ratios are expressed relative to 1956. Y-axis maximum set to "15" due to extremely high upper confidence intervals in some groups for the most recent birth cohorts.

**eFigure 4.** Male and Female Time Period Effects Derived From Age-Period-Cohort Models for Persons Aged 20-80 Years, Inclusive

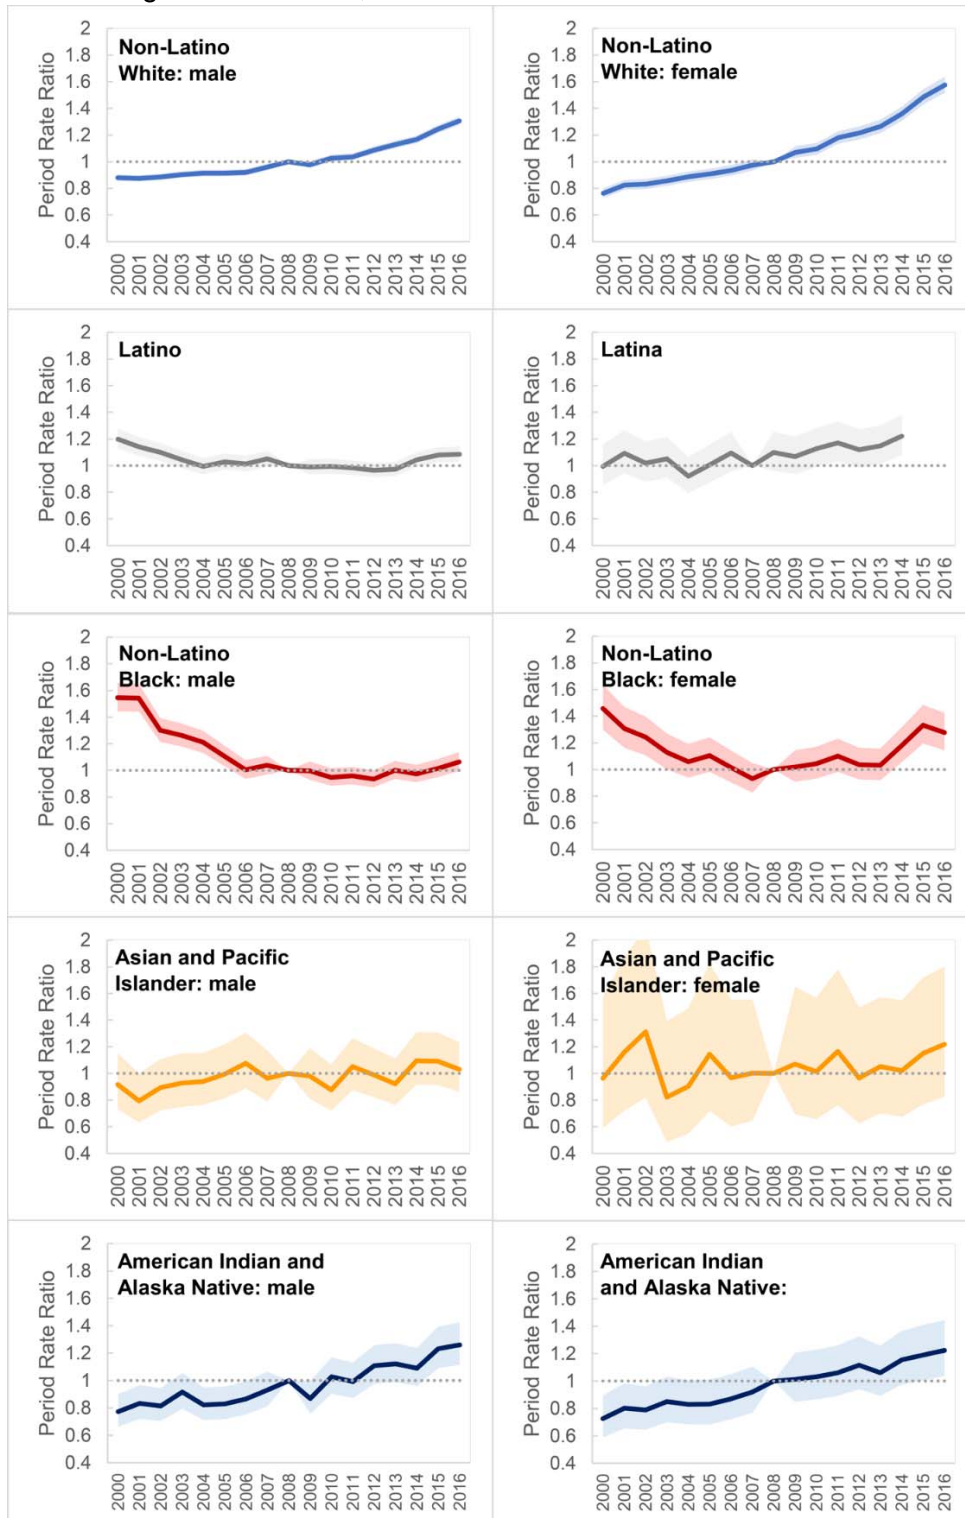

Alcohol-induced mortality rate ratios (with shaded 95% confidence intervals) for the midpoint of each year, 2000-2016, are expressed relative to the mid-point (2008) (Due to sparsity of data, Latina rate ratios are expressed relative to 2007).

**eFigure 5.** Annual Percentage Change in Alcohol-Induced Mortality Rate, 2000-2016, by County-Level Socioeconomic Status (SES) and Rurality

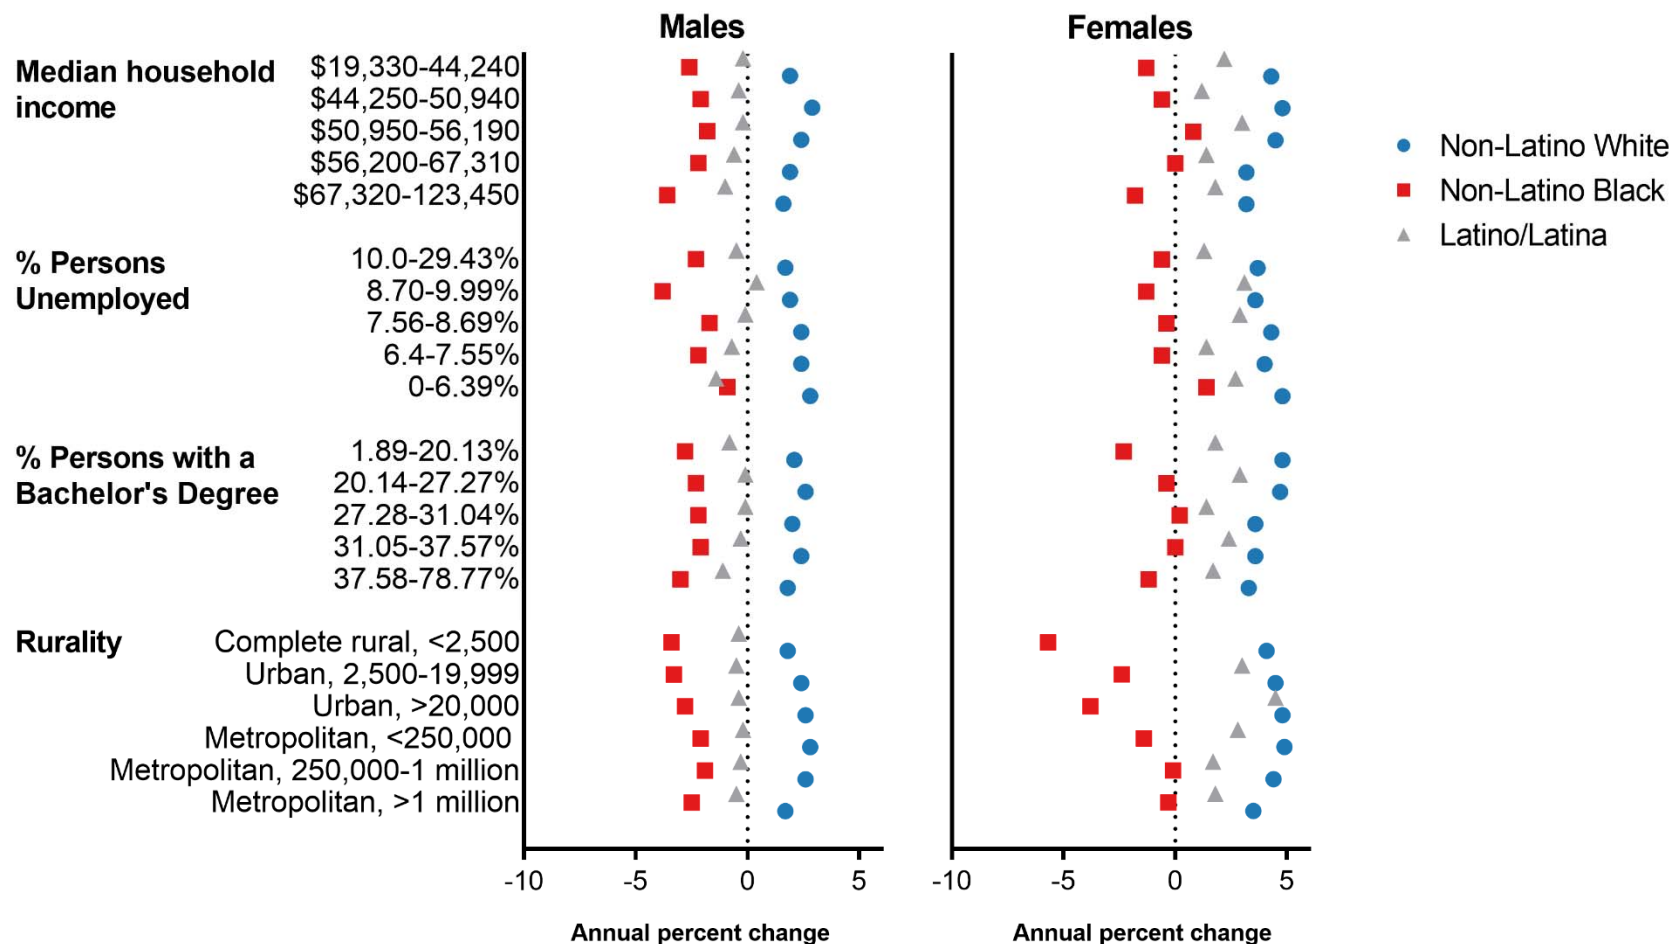

Supplement: jamanetwopen-3-e1921451-s001.pdf [file jamanetwopen-3-e1921451-s001.pdf]
